# Supplementary material for: BioMiCo: a supervised Bayesian model for inference of microbial community structure
Source: PubMed Central journal article supplement (PMC4359585; doi:10.1186/s40168-015-0073-x), 2015-03-10
Supplement: 40168_2015_73_MOESM1_ESM.pdf [file 40168_2015_73_MOESM1_ESM.pdf]

## ADDITIONAL FILE 1: Model overview with analytical solution for the posterior distribution of latent variables

We assume that each microbiome sample is a mixture of OTUs from one or more communities. We model the community mixture by using  $K$  pre-specified factors as mixture components, where factors serve as proxies for putative communities and their relative importance is permitted to differ between samples. The relative contribution of each factor to the  $n^{th}$  sample is modeled through the latent variable  $\pi_n$ . If a sample can be assumed, *a priori*, to reflect the contribution of as many as, say, 4 factors, then  $\pi_n$  is a probability vector of 4 non-zero values summing to one. Because we only require that some subset of factors contribute to a given sample, the probabilities of other non-contributing factors are set to zero.

Each putative community that is represented by a pre-specified factor is comprised of a fixed number of OTU assemblages ( $L$ ). The contribution of each assemblage to the  $k^{th}$  factor,  $\theta_k$ , is modeled by a vector of  $L$  mixing probabilities that sum to one. The element  $\theta_{kl}$  in a  $K \times L$  matrix  $\theta$  represents the relative contribution of assemblage  $l$  to factor  $k$ .

Each assemblage is comprised of a mixture of  $T$  different OTUs. The contribution of each OTU to the  $l^{th}$  assemblage,  $\phi_l$ , is modeled by a vector of  $T$  mixing probabilities that sum to one. The element  $\phi_{li}$  in  $L \times T$  matrix  $\phi$  represents the relative contribution of OTU  $i$  in assemblage  $l$ .

We assume an independent and identical (iid) symmetric Dirichlet priors on  $\pi_n$  and on the rows of  $\theta$  and  $\phi$ :

$$\pi_n \sim \text{Dirichlet}(\alpha_\pi)$$

$$\theta_k \sim \text{Dirichlet}(\alpha_\theta)$$

$$\phi_l \sim \text{Dirichlet}(\alpha_\phi)$$

The complete likelihood of the data given the hyper-parameters of the prior distributions is

$$\begin{aligned}
& P(X, Z, W, \pi, \theta, \phi | \alpha_\pi, \alpha_\theta, \alpha_\phi) = \\
& P(X|\pi)P(Z|X, \theta)P(W|Z, \phi) P(\pi|\alpha_\pi) P(\theta|\alpha_\theta)P(\phi|\alpha_\phi) = \\
& \prod_{n=1}^N \prod_{i=1}^{N_n} P(X_{ni} | \pi_n) \times \prod_{n=1}^N \prod_{i=1}^{N_n} P(Z_{ni} | \theta_{X_{ni}}) \times \prod_{n=1}^N \prod_{i=1}^{N_n} P(W_{ni} | \phi_{Z_{ni}}) \times \\
& P(\pi|\alpha_\pi)P(\theta|\alpha_\theta)P(\phi|\alpha_\phi)
\end{aligned}$$

where  $N$  is the number of samples in a dataset and  $N_n$  is the number of OTUs in sample  $n$ .  $Z$  and  $X$  represent the assemblage and factor assignments for each OTU in all samples, and  $X_{ni}$  and  $Z_{ni}$  represent the factor and assemblage assignments for OTU  $i$  in sample  $n$ . Note that  $Z_{ni}$  is a value between 1 and  $L$  (number of assemblages) and  $X_{ni}$  is a value between 1 and  $K$  (number of factors).  $W_{ni}$  is the OTU  $i$  in sample  $n$ , and has a value between 1 and  $T$ .

For posterior inference, we need to sample from the posterior distribution of latent variables given the data:

$$P(X, Z, \pi, \theta, \phi | W, \alpha_\pi, \alpha_\theta, \alpha_\phi)$$

where  $Z, Y, \pi, \theta$  and  $\phi$  are the latent variables in the model. We use collapsed Gibbs sampling, integrate out the variables  $\pi, \theta$  and  $\phi$ , and sample from the posterior distributions of assemblage ( $Z$ ) and factor assignments ( $X$ ). Employing Gibbs sampling, we sample the assemblage and factor assignments for OTU  $i$  in sample  $n$  ( $Z_{ni}, X_{ni}$ ) given all other assemblage and factor assignments for OTUs in all samples excluding the current OTU. Sampling of the assemblage and factor assignments is based on the following conditional probability:

$$\begin{aligned}
& P(Z_{ni}, X_{ni} | W, Z_{-ni}, X_{-ni}) = \\
& \frac{\iiint P(X, Z, W, \pi, \theta, \phi) d\pi d\theta d\phi}{\iiint P(X_{-ni}, Z_{-ni}, W, \pi, \theta, \phi) d\pi d\theta d\phi} = \\
& \frac{\int P(X|\pi)P(\pi|\alpha_\pi) d\pi}{\int P(X_{-ni}|\pi)P(\pi|\alpha_\pi) d\pi} \times \frac{\int P(Z|X, \theta)P(\theta|\alpha_\theta) d\theta}{\int P(Z_{-ni}|X_{-ni}, \theta)P(\theta|\alpha_\theta) d\theta} \times \frac{\int P(W|Z, \phi)P(\phi|\alpha_\phi) d\phi}{\int P(W|Z_{-ni}, \phi)P(\phi|\alpha_\phi) d\phi}
\end{aligned}$$

Solutions to integrals in the above equation can be analytically derived:

$$\begin{aligned}
& \int P(X|\pi)P(\pi|\alpha_\pi) d\pi = \\
& \int \prod_{n=1}^N \prod_{i=1}^{N_n} P(X_{ni}|\pi_n) \prod_{n=1}^N P(\pi_n|\alpha_\pi) d\pi = \\
& \int \prod_{n=1}^N \prod_{k=1}^K \pi_{nk}^{C_n^k} \prod_{n=1}^N \frac{\Gamma(K\alpha_\pi)}{\Gamma(\alpha_\pi)^K} \prod_{k=1}^K \pi_{nk}^{\alpha_\pi-1} d\pi = \\
& \prod_{n=1}^N \frac{\Gamma(K\alpha_\pi)}{\Gamma(\alpha_\pi)^K} \frac{\prod_{k=1}^K \Gamma(\alpha_\pi + C_n^k)}{\Gamma(\sum_{k=1}^K (\alpha_\pi + C_n^k))}
\end{aligned}$$

where  $C_n^k$  the number of times that an OTU in the  $n^{\text{th}}$  sample is assigned to the  $k^{\text{th}}$  factor.

$$\begin{aligned}
& \int P(Z|X, \theta)P(\theta|\alpha_\theta) d\theta = \\
& \int \prod_{n=1}^N \prod_{i=1}^{N_n} P(Z_{ni}|X_{ni}, \theta) \prod_{k=1}^K P(\theta_k|\alpha_\theta) d\theta = \\
& \int \prod_{k=1}^K \prod_{l=1}^L \theta_{kl}^{C_k^l} \prod_{k=1}^K \frac{\Gamma(L\alpha_\theta)}{\Gamma(\alpha_\theta)^L} \prod_{l=1}^L \theta_{kl}^{\alpha_\theta-1} d\theta = \\
& \prod_{k=1}^K \frac{\Gamma(L\alpha_\theta)}{\Gamma(\alpha_\theta)^L} \frac{\prod_{l=1}^L \Gamma(\alpha_\theta + C_k^l)}{\Gamma(\sum_{l=1}^L (\alpha_\theta + C_k^l))}
\end{aligned}$$

where  $C_k^l$  is the number of times that an OTU in the  $k^{\text{th}}$  factor is assigned to the  $l^{\text{th}}$  assemblage.

$$\begin{aligned}
& \int P(W|Z, \phi)P(\phi|\alpha_\phi) d\phi = \\
& \int \prod_{n=1}^N \prod_{i=1}^{N_n} P(W_{ni}|Z_{ni}, \theta) \prod_{l=1}^L P(\phi_l|\alpha_\phi) d\phi = \\
& \int \prod_{l=1}^L \prod_{t=1}^T \phi_{lt}^{C_t^l} \prod_{l=1}^L \frac{\Gamma(T\alpha_\phi)}{\Gamma(\alpha_\phi)^T} \prod_{t=1}^T \phi_{lt}^{\alpha_\phi-1} d\phi = \\
& \prod_{l=1}^L \frac{\Gamma(T\alpha_\phi)}{\Gamma(\alpha_\phi)^T} \frac{\prod_{t=1}^T \Gamma(\alpha_\phi + C_t^l)}{\Gamma(\sum_{t=1}^T (\alpha_\phi + C_t^l))}
\end{aligned}$$

where  $C_t^l$  is the number of times that OTU  $t$  in is assigned to the  $l^{\text{th}}$  assemblage, with the value of  $t$  between 1 and  $T$ .

Given the above conditional probability we use Gibbs sampling for drawing samples from the posterior distribution  $P(X_{ni} = k, Z_{ni} = l | X_{-ni}, Z_{-ni}, W, \alpha_\pi, \alpha_\theta, \alpha_\phi)$  where  $Z_{-ni}$  represents the assemblage assignment for all OTUs in all samples except only the  $i^{\text{th}}$  OTU in  $n^{\text{th}}$  microbiome sample, and  $X_{-ni}$  represents the factor assignment for all OTUs in all samples except only the  $i^{\text{th}}$  OTU in  $n^{\text{th}}$  microbiome sample. At each iteration of Gibbs sampling, we repeat the following in a random order. For each OTU in each sample, we draw the assemblage and factor assignment ( $Z_{ni}$  and  $X_{ni}$ ) of an OTU given the current assemblage and factor assignments of all other OTUs in this and every other sample. From the following equation, a value is calculated for each possible combination of values for  $X_{ni}$  and  $Z_{ni}$ .

$$\begin{aligned}
& P(X_{ni} = k, Z_{ni} = l | X_{-ni}, Z_{-ni}, W, \alpha_\pi, \alpha_\theta, \alpha_\phi) = \\
& \frac{\alpha_\pi + C_n^k}{\sum_{k'} (\alpha_\pi + C_n^{k'})} \times \frac{\alpha_\theta + C_k^l}{\sum_{l'} (\alpha_\theta + C_k^{l'})} \times \frac{\alpha_\phi + C_{W_{ni}}^l}{\sum_{w'} (\alpha_\phi + C_{w'}^l)}
\end{aligned}$$

Note that  $X_{ni}$  can take only factor assignments that are known to be contributing to sample  $n$ . These values are then normalized and used to draw new assignment values for  $X_{ni}$  and  $Z_{ni}$  which are immediately updated for use in the next iteration. The hyper-parameters of our model ( $\alpha_\pi, \alpha_\theta$ , and  $\alpha_\phi$ ) can be fixed by the user, or MCMC sampling can be used to learn them from the training

data. In the latter case we can employ Metropolis-within-Gibbs sampling scheme where Metropolis-Hastings updates are used to resample new values for hyper-parameters once all the other parameters of the model have been sampled.
