# Supplementary material for: BioMiCo: a supervised Bayesian model for inference of microbial community structure
Source: PubMed Central journal article supplement (PMC4359585; doi:10.1186/s40168-015-0073-x), 2015-03-10
Supplement: 40168_2015_73_MOESM2_ESM.pdf [file 40168_2015_73_MOESM2_ESM.pdf]

## ADDITIONAL FILE 2: Simulation and validation of the inference algorithm

### Simulation:

Our model is a generative model; *i.e.*, it assumes a process by which data is generated. Therefore, it is straightforward to simulate data for the purpose of testing the inference algorithm. For each of  $i$  OTUs in microbiome sample  $n$ :

- Environmental factor  $X_{ni} \in \{1, 2, \dots, K\}$  is drawn from the factor mixture  $\pi_n$  associated with sample  $n$ .
- Assemblage  $Y_{ni} \in \{1, 2, \dots, L\}$  is drawn from the mixture of assemblages associated with factor  $Z_{ni}$  that was drawn in the previous step. The assemblage is chosen by sampling from the row  $Z_{ni}$  of matrix  $\theta$  (*i.e.*,  $\theta_{Z_{ni}}$ ).
- Choose the OTU for assemblage  $Y_{ni}$  by sampling from row  $Y_{ni}$  of matrix  $\phi$  (*i.e.*,  $\phi_{Y_{ni}}$ ).

This generative process is repeated for every OTU in a simulated microbiome sample  $n$ . The same process generates the OTU composition of all microbiome samples.

We simulated and analyzed data to (i) verify that our sampling algorithm can recover the parameter values used to generate structured microbiome samples in the training phase, and (ii) to investigate what conditions represent easy and hard classification problems for the testing phase. Hence, our simulation design is based on covering a very wide range of scenarios. We simulated different

scenarios by selecting the number of environmental factors, assemblages and OTUs from ( $K = 4, 8, 12$ ), ( $L = 5, 10, 30, 50, 70$ ) and ( $T = 500, 1000, 2000, 4000$ ) respectively. Analyses of these simulated data are computationally costly. Because it is unlikely that there will be highly complex assemblage structure in real data having low numbers of OTUs, to save on computational costs we did not investigate very large numbers of assemblages (50 and 70) for communities having low numbers of OTUs (e.g., 500). The number of assemblages we investigated relative to the number of OTUs are given in Table 1 below. Note that for the largest number of OTUs (4000) we did investigate the full range of assemblage sizes (5 to 70). Lastly, because we do not expect unknown microbiome samples to be identical in their assemblage composition we generated test samples according to a variety of mixtures (Appendix 1).

**Table 1. OTU counts vary according to the number of assemblages in the generating model.**

| OTUs | Assemblages |    |    |    |    |
|------|-------------|----|----|----|----|
|      | 5           | 10 | 30 | 50 | 70 |
| 500  | +           | +  | -  | -  | -  |
| 1000 | +           | +  | +  | -  | -  |
| 2000 | +           | +  | +  | +  | -  |
| 4000 | +           | +  | +  | +  | +  |

Simulated communities had numbers of OTUs  $\geq 30 \times$  the number of assemblages. A plus sign (+) indicates where assemblage counts satisfied this condition, and hence were evaluated as part of the simulated study. A minus sign (-) indicates a combination of OTU and assemblage count that was not evaluated.

Given the above range of scenarios, we also generated under a wide range of community structures. In our simulation the concentration parameter for the Dirichlet prior,  $\alpha_\phi$ , controls the amount of mixing among OTUs contributing to assemblages. We employed values of 0.01, 0.05 and 0.25. The higher the

concentration parameter, the more evenly distributed the OTUs will be among assemblages (*i.e.*, less signal), and consequently the more the difficult this type of structure is for the testing phase of the inference algorithm. As can be seen in Figure 1,  $\alpha_\phi = 0.25$  yields a more even distribution within the unit simplex (*i.e.*, the distribution is less concentrated in the corners as compared to when  $\alpha_\phi$  is small). As  $\alpha_\phi = 0.25$  represents a much less structured community, it poses a more significant analytical challenge.

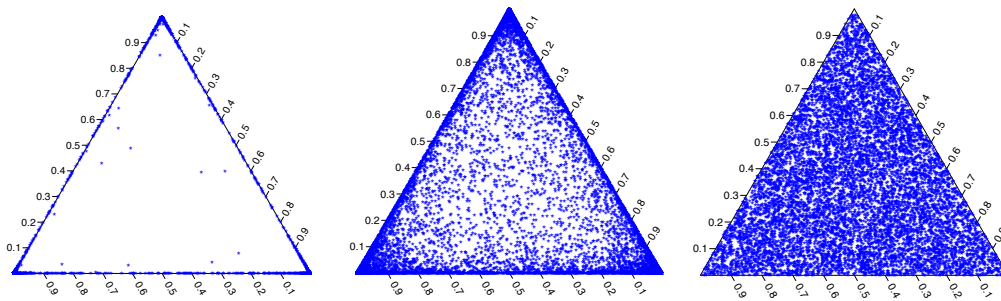

**Figure 1.** Samples (10,000 independent samples) drawn from Dirichlet distributions with concentration parameters equal to 0.01 (left), 0.25 (centre) and 1.0 (right). Note that dimension is  $K=3$  here for illustrative purposes; simulations were carried out by using  $K = 4, 8, 12$ . Also note how a significant number of samples drawn from a Dirichlet distribution with concentration parameter of 0.25 (centre) have mixed membership to all three groups, and how the distribution is much more evenly distributed as compared to a concentration parameter of 0.01. A concentration parameters equal to 1.0 (right) yields uniform samples within the simplex.

The concentration parameter  $\alpha_\theta$  controls the amount of mixing among assemblages contributing to factors. The higher the concentration parameter, the more evenly distributed the assemblages will be among the various environmental factors. Again, we employed values of 0.01, 0.05 and 0.25.

We added an extreme case by setting  $\alpha_\theta = 1.0$ . This completely removes from the testing phase the added information-value of having assemblage structure within the data (see Figure 1 for an example). Such data represent a highly challenging classification task when combined with  $\alpha_\phi = 0.25$ , as the only signal in the data resides in OTUs that will be widely shared among environmental factors. Thus we have three scenarios that constitute a convenient reference for training and testing: (i) “easy” datasets, where  $\alpha_\phi = 0.01$  and  $\alpha_\theta = 0.01$ , (ii) “hard” datasets, where  $\alpha_\phi = 0.25$  and  $\alpha_\theta = 0.25$ , and (iii) “extreme” datasets, where  $\alpha_\phi = 0.25$  and  $\alpha_\theta = 1.0$ . The remaining scenarios we evaluated represent a wide range of conditions between “easy” and “hard”. Taken together, we evaluated a total of 504 different scenarios.

### **Assessment of the inference algorithm:**

We validated the inference algorithm by comparing the values of each hyper-parameter specified in the generating model ( $\alpha_\phi$  and  $\alpha_\theta$ ) to the values estimated by using Metropolis-Hastings during the training phase. We obtained reasonable estimates in the “easy”, “hard” and even the “extreme” scenarios (Table 2), indicating the model did infer hierarchical structure when present, as well as indicate when it is absent (as was the case in the “extreme” scenario, where the inferred values of  $\alpha_\theta$  were close 1.0). Note that any inference from a finite number of MCMC samples can only approximate the target distribution, and the number of steps required for convergence with a similar amount of error will differ among

datasets. Given the computational cost of a large-scale simulation study, and that all the simulated datasets were run to the same length (5000 iterations; 500 burn-in with sampling every 250 thereafter), some differences among scenarios in the approximation of the target distribution (Table 2) are expected.

**Table 2.** Inferred values for the hyper-parameters of BioMCo

|             | “easy”             |                      | “hard”             |                      | “extreme”          |                     |
|-------------|--------------------|----------------------|--------------------|----------------------|--------------------|---------------------|
|             | $\alpha_\phi=0.01$ | $\alpha_\theta=0.01$ | $\alpha_\phi=0.25$ | $\alpha_\theta=0.25$ | $\alpha_\phi=0.25$ | $\alpha_\theta=1.0$ |
| <b>K=4</b>  |                    |                      |                    |                      |                    |                     |
| $L=5$       | 0.010              | 0.031                | 0.246              | 0.393                | 0.241              | 0.815               |
| $L=10$      | 0.010              | 0.017                | 0.252              | 0.298                | 0.229              | 0.940               |
| $L=30$      | 0.010              | 0.018                | 0.287              | 0.214                | 0.239              | 1.038               |
| $L=50$      | 0.011              | 0.012                | 0.227              | 0.332                | 0.231              | 1.058               |
| <b>K=8</b>  |                    |                      |                    |                      |                    |                     |
| $L=5$       | 0.010              | 0.023                | 0.240              | 0.385                | 0.243              | 1.004               |
| $L=10$      | 0.011              | 0.011                | 0.244              | 0.310                | 0.244              | 0.966               |
| $L=30$      | 0.010              | 0.012                | 0.257              | 0.216                | 0.230              | 1.128               |
| $L=50$      | 0.011              | 0.011                | 0.267              | 0.212                | 0.234              | 1.100               |
| <b>K=12</b> |                    |                      |                    |                      |                    |                     |
| $L=5$       | 0.010              | 0.015                | 0.241              | 0.276                | 0.233              | 1.141               |
| $L=10$      | 0.011              | 0.013                | 0.246              | 0.277                | 0.238              | 1.028               |
| $L=30$      | 0.010              | 0.013                | 0.253              | 0.249                | 0.243              | 1.027               |
| $L=50$      | 0.010              | 0.010                | 0.249              | 0.280                | 0.250              | 0.877               |

The hyper-parameters of BioMiCo are the concentration parameters of two symmetric Dirichlet distributions.

Given that hierarchal structure was detected in the “easy” and “hard” scenarios, we also assessed the inference of assemblage mixing probabilities in selected scenarios. When there is hierarchical signal, the model-derived assemblages could be easily coordinated with the structure of the generating model by eye when there are not too many assemblages to inspect (*i.e.*, when  $L = 5$  or  $10$ ). We did this for both “easy” and “hard” datasets for  $K=4, 8$  and  $12$  environmental factors, and compared the inferred assemblage mixing probabilities to those used

to generate the data by using the Jensen–Shannon divergence (JSD: [1]). The low JSD scores presented in Table 3 illustrate that the assemblage mixing probabilities were reliably estimated.

**Table 3.** Similarity between the inferred and generating distribution of assemblages, as measured by the Jensen–Shannon divergence.

| <b>“Easy” (<math>\alpha_\phi = 0.01</math> and <math>\alpha_\theta = 0.01</math>)</b> |                              |                            |
|---------------------------------------------------------------------------------------|------------------------------|----------------------------|
| <b>Factors</b>                                                                        | <b>Number of assemblages</b> |                            |
|                                                                                       | <b><math>L = 5</math></b>    | <b><math>L = 10</math></b> |
| <b><math>K = 4</math></b>                                                             | 0.00021                      | 0.00021                    |
| <b><math>K = 8</math></b>                                                             | 0.00002                      | 0.04079                    |
| <b><math>K = 12</math></b>                                                            | 0.00001                      | 0.00006                    |

  

| <b>“Hard” (<math>\alpha_\phi = 0.25</math> and <math>\alpha_\theta = 0.25</math>)</b> |                              |                            |
|---------------------------------------------------------------------------------------|------------------------------|----------------------------|
| <b>Factor</b>                                                                         | <b>Number of assemblages</b> |                            |
|                                                                                       | <b><math>L = 5</math></b>    | <b><math>L = 10</math></b> |
| <b><math>K = 4</math></b>                                                             | 0.00105                      | 0.02374                    |
| <b><math>K = 8</math></b>                                                             | 0.00215                      | 0.00489                    |
| <b><math>K = 12</math></b>                                                            | 0.00082                      | 0.00410                    |

The Jensen–Shannon divergence (JSD) quantifies the similarity between two probability distributions. JSD=0 when the two distributions are identical. JSD=1 at its maximum (when the two distributions are distinct).

Given that we obtained reliable inferences within the training phase, we next investigated all the scenarios between “easy” and “hard” so as to investigate the inference of mixing probabilities for the environmental labels in the test dataset. It is with respect to these values that real datasets will be classified according to environmental factors. Figure 2 presents a heat map of the mean JSD scores (over 103 test samples per scenario) between the true mixing probabilities for each test sample, and those inferred by BioMiCo. Blue colors indicate very good estimation of the mixture weights for each environmental factor. White indicates

some divergence, and red indicates highly divergent inferences. In no case did we obtain highly divergent estimates. The dominance of low divergences (blue) in Figure 2 indicates that the inference algorithm is capable of learning which assemblages are associated with different environmental variables, and reliably inferring the mixture weights for environmental variables, even when unlabeled test samples are unique mixtures of assemblages that were not encountered in the training phase.

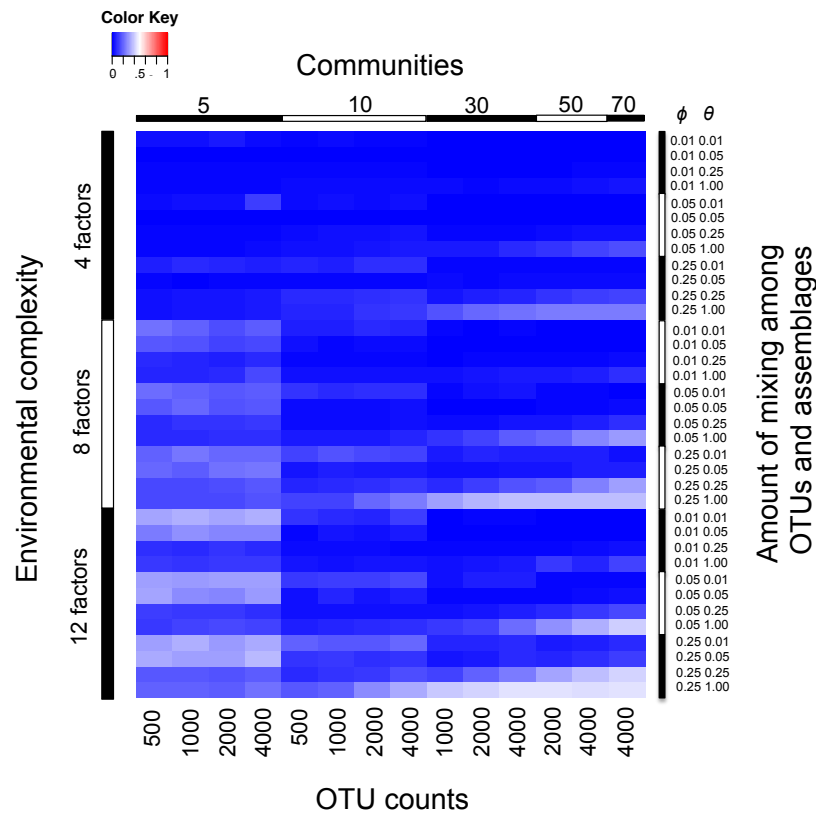

**Figure 2.** Heatmap of mean Jensen Shannon divergence scores between the true mixing probabilities for each test set of data, and those inferred by BioMiCo. This plot covers 504 different scenarios, and for each one there was a test set of data comprised of 103 microbiome samples. The values shown in each cell of this heatmap are the average of 103 JSD scores per scenario. The number of distinct scenarios is due to differences in OTU counts (500, 1000, 2000, 4000), number of communities (5, 10, 30, 50, 70), environmental complexity (4, 8, 12 factors) and mixing values among OTUs ( $\theta$ ) (0.01, 0.05, 0.25) and assemblages ( $\phi$ ) (0.01, 0.05, 0.25 and 1.0).

The results in Figure 2 do reveal the conditions that pose the biggest challenges to inference (indicated by light blue to white). The most challenging conditions reflect two type of scenarios: (i) few assemblages ( $L=5$ ) with many factors ( $K=8$  and  $12$ ), and (ii) communities with very little structure (“hard” and “extreme” cases:  $\alpha_\phi = 0.25$  and  $\alpha_\theta = 0.25$  or  $1.0$ ) divided among a large numbers of assemblages ( $L=30, 50$  and  $70$ ). In the first type of scenario, classification was attempted according to  $8$  and  $12$  factor labels. In these cases the community structure was concentrated in a very small number of assemblages, and the training samples had low mixture complexity; this yielded too little signal to support classification of individual samples according to so many different environmental factors. We expect that this will be the case whenever  $K$  is greater than  $L$ . Note that classification was highly reliable when there were just  $4$  factor labels, or more complex community structures (Figure 2). In the second type of scenario, a limited amount of community structure was spread across a very large number of assemblages, thereby diluting the available signal. These two types of conditions represent two different ways in which the boundary on performance might ultimately be reached in real data: (i) attempting classification for too many factor labels in structured, but low complexity, data and (ii) attempting even simple classification from very weakly structured data.

Users of BioMiCo should note that performance also can be assessed for their own real datasets as long as they withhold a portion of their labeled samples for the purpose of cross validating their trained-model. If the training data is too small to withhold a large number of labeled samples, then they can use a technique



called “leave-one-out cross validation” that aggregates the predictive accuracy for each sample in the training data by “hiding” each sample, in turn, from the model and testing the model’s predictions for that sample [2]. At the end of a complete “leave-one-out rotation”, the performance of the model for real data can then be measured as the percent of samples that were correctly classified [3].

**References:**

1. Lin, J. (1991) Divergence measures based on the shannon entropy. *IEEE Transactions on Information Theory* 37(1):145–151.
2. Hastie, T., Tibshirani, R., Friedman, J., Hastie, T., Friedman, J., and Tibshirani, R. (2009) *The elements of statistical learning*, 2nd edn. USA: Springer.
3. El-Swais, H., Dunn, K.A., Bielawski, J.P., Li, W.W.K., Walsh, D.A. (2014) Seasonal assemblages and short-lived blooms in northwest Atlantic Ocean bacterioplankton. *Environmental Microbiology*. (In Press).

## APPENDIX: Environment labels for test and training data samples.

| K=4      |       |      |             | K=8   |       |      |             | K=12  |       |      |              |
|----------|-------|------|-------------|-------|-------|------|-------------|-------|-------|------|--------------|
| Training |       | Test |             | Train |       | Test |             | Train |       | Test |              |
| ID       | Label | ID   | Label       | ID    | Label | ID   | Label       | ID    | Label | ID   | Label        |
| 2        | E2    | 1    | E1          | 2     | E3    | 1    | E1          | 2     | E4    | 1    | E2           |
| 4        | E1    | 3    | E1          | 4     | E1    | 3    | E1          | 4     | E1    | 3    | E1           |
| 5        | E4    | 6    | E2          | 5     | E6    | 6    | E3          | 5     | E9    | 6    | E5           |
| 7        | E4    | 10   | E2,E1,E4    | 7     | E6    | 10   | E3,E2,E5    | 7     | E8    | 10   | E4,E2,E8     |
| 8        | E3    | 12   | E2          | 8     | E5    | 12   | E4          | 8     | E6    | 12   | E6           |
| 9        | E1    | 15   | E1,E2       | 9     | E1    | 15   | E1,E4       | 9     | E12   | 15   | E2,E6        |
| 11       | E3    | 17   | E3,E1,E2,E4 | 11    | E4    | 17   | E5,E2,E4,E8 | 11    | E6    | 17   | E7,E2,E12,E9 |
| 13       | E3    | 18   | E2,E4,E3    | 13    | E4    | 18   | E4,E8,E6    | 13    | E5    | 18   | E6,E12,E10   |
| 14       | E2    | 19   | E1,E4,E3    | 14    | E3    | 19   | E2,E8,E1    | 14    | E4    | 19   | E3,E4,E1     |
| 16       | E2    | 29   | E2          | 16    | E3    | 29   | E3          | 16    | E4    | 29   | E5           |
| 20       | E3    | 30   | E2,E1       | 20    | E5    | 30   | E3,E2       | 20    | E7    | 30   | E4,E3        |
| 21       | E3    | 35   | E3,E1,E4    | 21    | E4    | 35   | E6,E3,E7    | 21    | E5    | 35   | E8,E4,E11    |
| 22       | E2    | 36   | E1,E4       | 22    | E3    | 36   | E1,E2       | 22    | E4    | 36   | E2,E12       |
| 23       | E4    | 38   | E1,E2,E3    | 23    | E7    | 38   | E2,E3,E5    | 23    | E10   | 38   | E2,E4,E7     |
| 24       | E2    | 39   | E4          | 24    | E2    | 39   | E8          | 24    | E2    | 39   | E12          |
| 25       | E4    | 40   | E3          | 25    | E7    | 40   | E6          | 25    | E10   | 40   | E9           |
| 26       | E3    | 41   | E3,E1       | 26    | E4    | 41   | E6,E1       | 26    | E6    | 41   | E8,E1        |
| 27       | E3    | 42   | E1          | 27    | E5    | 42   | E2          | 27    | E6    | 42   | E2           |
| 28       | E1    | 43   | E2          | 28    | E8    | 43   | E4          | 28    | E11   | 43   | E6           |
| 31       | E1    | 44   | E3          | 31    | E1    | 44   | E6          | 31    | E1    | 44   | E9           |
| 32       | E3    | 45   | E1          | 32    | E4    | 45   | E2          | 32    | E5    | 45   | E3           |
| 33       | E1    | 46   | E1,E3       | 33    | E1    | 46   | E1,E7       | 33    | E1    | 46   | E1,E10       |
| 34       | E4    | 47   | E3          | 34    | E7    | 47   | E5          | 34    | E10   | 47   | E7           |
| 37       | E4    | 48   | E4,E1,E2    | 37    | E7    | 48   | E8,E1,E6    | 37    | E10   | 48   | E12,E1,E9    |
| 50       | E2    | 49   | E3,E1       | 50    | E2    | 49   | E5,E1       | 50    | E2    | 49   | E7,E1        |
| 53       | E3    | 51   | E4,E2       | 53    | E5    | 51   | E7,E4       | 53    | E6    | 51   | E10,E7       |
| 55       | E3    | 52   | E1,E4,E2    | 55    | E5    | 52   | E2,E8,E5    | 55    | E7    | 52   | E2,E4,E7     |
| 58       | E4    | 54   | E4          | 58    | E6    | 54   | E8          | 58    | E8    | 54   | E12          |
| 59       | E4    | 56   | E1,E3,E2,E4 | 59    | E7    | 56   | E1,E7,E6,E4 | 59    | E10   | 56   | E1,E10,E9,E7 |
| 61       | E1    | 57   | E4          | 61    | E1    | 57   | E8          | 61    | E12   | 57   | E12          |
| 65       | E4    | 60   | E2,E1,E4    | 65    | E6    | 60   | E4,E1,E8    | 65    | E9    | 60   | E5,E1,E7     |
| 67       | E3    | 62   | E4,E1,E2    | 67    | E5    | 62   | E8,E1,E4    | 67    | E7    | 62   | E11,E1,E6    |
| 68       | E4    | 63   | E1,E2,E4    | 68    | E6    | 63   | E2,E4,E3    | 68    | E8    | 63   | E3,E6,E5     |
| 69       | E2    | 64   | E2,E1       | 69    | E2    | 64   | E3,E1       | 69    | E2    | 64   | E4,E1        |
| 71       | E3    | 66   | E4          | 71    | E4    | 66   | E7          | 71    | E5    | 66   | E11          |
| 72       | E3    | 70   | E3,E2       | 72    | E5    | 70   | E5,E3       | 72    | E6    | 70   | E7,E5        |
| 73       | E2    | 74   | E2,E1       | 73    | E3    | 74   | E4,E1       | 73    | E4    | 74   | E5,E1        |
| 78       | E1    | 75   | E4,E2,E3    | 78    | E8    | 75   | E7,E5,E8    | 78    | E11   | 75   | E11,E7,E8    |
| 82       | E2    | 76   | E1          | 82    | E3    | 76   | E1          | 82    | E3    | 76   | E1           |
| 84       | E1    | 77   | E3          | 84    | E8    | 77   | E6          | 84    | E11   | 77   | E9           |
| 87       | E4    | 79   | E3          | 87    | E6    | 79   | E5          | 87    | E8    | 79   | E7           |
| 88       | E4    | 80   | E3,E4       | 88    | E7    | 80   | E6,E7       | 88    | E9    | 80   | E8,E11       |
| 89       | E2    | 81   | E4,E1       | 89    | E3    | 81   | E7,E2       | 89    | E4    | 81   | E10,E3       |
| 92       | E4    | 83   | E1,E2       | 92    | E7    | 83   | E2,E4       | 92    | E9    | 83   | E3,E6        |
| 94       | E3    | 85   | E4          | 94    | E4    | 85   | E8          | 94    | E5    | 85   | E12          |
| 97       | E4    | 86   | E3          | 97    | E7    | 86   | E6          | 97    | E10   | 86   | E9           |
| 100      | E3    | 90   | E1          | 100   | E5    | 90   | E2          | 100   | E6    | 90   | E2           |
| 101      | E1    | 91   | E4,E3       | 101   | E1    | 91   | E8,E6       | 101   | E1    | 91   | E12,E9       |
| 104      | E1    | 93   | E1          | 104   | E1    | 93   | E1          | 104   | E1    | 93   | E2           |
| 106      | E4    | 95   | E1,E4,E3    | 106   | E7    | 95   | E1,E2,E8    | 106   | E10   | 95   | E1,E3,E2     |
| 107      | E3    | 96   | E4          | 107   | E4    | 96   | E8          | 107   | E5    | 96   | E11          |
| 108      | E2    | 98   | E2,E1       | 108   | E3    | 98   | E3,E2       | 108   | E4    | 98   | E4,E2        |
| 111      | E4    | 99   | E3,E1,E2    | 111   | E6    | 99   | E6,E1,E5    | 111   | E9    | 99   | E9,E1,E7     |
| 114      | E3    | 102  | E3          | 114   | E4    | 102  | E5          | 114   | E5    | 102  | E7           |
| 115      | E4    | 103  | E1,E2,E4    | 115   | E6    | 103  | E1,E3,E8    | 115   | E8    | 103  | E1,E5,E12    |
| 117      | E1    | 105  | E4,E1,E3    | 117   | E8    | 105  | E7,E1,E8    | 117   | E11   | 105  | E10,E1,E11   |
| 118      | E2    | 109  | E4          | 118   | E3    | 109  | E7          | 118   | E4    | 109  | E10          |
| 119      | E3    | 110  | E2,E4       | 119   | E5    | 110  | E3,E4       | 119   | E6    | 110  | E5,E7        |
| 121      | E3    | 112  | E1,E2,E3,E4 | 121   | E5    | 112  | E2,E4,E6,E5 | 121   | E7    | 112  | E2,E6,E9,E8  |
| 126      | E1    | 113  | E4,E2       | 126   | E8    | 113  | E8,E5       | 126   | E12   | 113  | E12,E8       |
| 130      | E1    | 116  | E3,E2,E1    | 130   | E1    | 116  | E5,E4,E1    | 130   | E1    | 116  | E7,E12,E2    |
| 131      | E1    | 120  | E2          | 131   | E1    | 120  | E3          | 131   | E12   | 120  | E5           |
| 132      | E4    | 122  | E4,E3       | 132   | E7    | 122  | E8,E6       | 132   | E10   | 122  | E11,E9       |
| 133      | E1    | 123  | E4,E2       | 133   | E1    | 123  | E7,E5       | 133   | E1    | 123  | E10,E8       |
| 134      | E4    | 124  | E4,E1       | 134   | E6    | 124  | E7,E3       | 134   | E8    | 124  | E10,E4       |

|     |    |     |             |     |    |     |             |     |     |     |             |
|-----|----|-----|-------------|-----|----|-----|-------------|-----|-----|-----|-------------|
| 135 | E4 | 125 | E3,E2,E1    | 135 | E6 | 125 | E5,E8,E3    | 135 | E8  | 125 | E7,E8,E5    |
| 136 | E3 | 127 | E3          | 136 | E4 | 127 | E5          | 136 | E6  | 127 | E7          |
| 137 | E3 | 128 | E1,E2       | 137 | E4 | 128 | E2,E4       | 137 | E6  | 128 | E2,E7       |
| 138 | E2 | 129 | E2          | 138 | E2 | 129 | E4          | 138 | E2  | 129 | E5          |
| 139 | E4 | 140 | E3          | 139 | E6 | 140 | E6          | 139 | E8  | 140 | E9          |
| 145 | E1 | 141 | E3,E1       | 145 | E8 | 141 | E5,E1       | 145 | E12 | 141 | E7,E2       |
| 150 | E2 | 142 | E1          | 150 | E2 | 142 | E1          | 150 | E2  | 142 | E1          |
| 151 | E2 | 143 | E4,E1       | 151 | E2 | 143 | E7,E2       | 151 | E2  | 143 | E10,E3      |
| 157 | E2 | 144 | E1          | 157 | E3 | 144 | E2          | 157 | E3  | 144 | E2          |
| 161 | E1 | 146 | E1          | 161 | E8 | 146 | E2          | 161 | E11 | 146 | E3          |
| 163 | E4 | 147 | E3,E4       | 163 | E7 | 147 | E5,E7       | 163 | E10 | 147 | E8,E11      |
| 166 | E1 | 148 | E3          | 166 | E1 | 148 | E5          | 166 | E1  | 148 | E7          |
| 167 | E3 | 149 | E1          | 167 | E5 | 149 | E1          | 167 | E7  | 149 | E1          |
| 171 | E2 | 152 | E3,E4       | 171 | E2 | 152 | E5,E6       | 171 | E2  | 152 | E7,E8       |
| 173 | E4 | 153 | E4          | 173 | E7 | 153 | E8          | 173 | E9  | 153 | E12         |
| 174 | E1 | 154 | E1          | 174 | E8 | 154 | E2          | 174 | E11 | 154 | E2          |
| 175 | E2 | 155 | E4          | 175 | E3 | 155 | E7          | 175 | E3  | 155 | E11         |
| 176 | E3 | 156 | E1          | 176 | E5 | 156 | E1          | 176 | E6  | 156 | E2          |
| 178 | E2 | 158 | E2,E4       | 178 | E3 | 158 | E4,E5       | 178 | E4  | 158 | E5,E8       |
| 179 | E2 | 159 | E3,E2,E1    | 179 | E2 | 159 | E6,E5,E1    | 179 | E2  | 159 | E9,E7,E2    |
| 180 | E3 | 160 | E4,E2,E3    | 180 | E5 | 160 | E8,E4,E5    | 180 | E6  | 160 | E11,E6,E8   |
| 181 | E2 | 162 | E2,E3,E1    | 181 | E2 | 162 | E4,E6,E2    | 181 | E2  | 162 | E5,E9,E2    |
| 183 | E2 | 164 | E4,E1       | 183 | E3 | 164 | E8,E3       | 183 | E4  | 164 | E12,E4      |
| 185 | E2 | 165 | E1,E4       | 185 | E2 | 165 | E1,E2       | 185 | E2  | 165 | E1,E3       |
| 188 | E4 | 168 | E4,E2       | 188 | E7 | 168 | E7,E4       | 188 | E10 | 168 | E11,E7      |
| 189 | E3 | 169 | E3,E1,E2    | 189 | E4 | 169 | E5,E2,E8    | 189 | E5  | 169 | E7,E4,E8    |
| 190 | E2 | 170 | E4          | 190 | E2 | 170 | E7          | 190 | E3  | 170 | E10         |
| 193 | E2 | 172 | E3,E4       | 193 | E2 | 172 | E5,E6       | 193 | E2  | 172 | E7,E10      |
| 194 | E1 | 177 | E2,E1       | 194 | E1 | 177 | E4,E1       | 194 | E12 | 177 | E6,E1       |
| 195 | E1 | 182 | E4,E2,E1    | 195 | E8 | 182 | E7,E4,E2    | 195 | E11 | 182 | E11,E6,E4   |
| 198 | E1 | 184 | E1          | 198 | E8 | 184 | E2          | 198 | E11 | 184 | E2          |
| 200 | E1 | 186 | E2          | 200 | E1 | 186 | E4          | 200 | E1  | 186 | E6          |
|     |    | 187 | E2          |     |    | 187 | E3          |     |     | 187 | E4          |
|     |    | 191 | E2          |     |    | 191 | E4          |     |     | 191 | E5          |
|     |    | 192 | E1,E2,E4,E3 |     |    | 192 | E1,E5,E3,E2 |     |     | 192 | E1,E7,E5,E4 |
|     |    | 196 | E3,E4,E1    |     |    | 196 | E5,E7,E1    |     |     | 196 | E7,E11,E1   |
|     |    | 197 | E4,E2       |     |    | 197 | E8,E4       |     |     | 197 | E12,E6      |
|     |    | 199 | E4,E2,E1    |     |    | 199 | E7,E3,E8    |     |     | 199 | E10,E5,E4   |
