# Supplementary material for: BioMiCo: a supervised Bayesian model for inference of microbial community structure
Source: PubMed Central journal article supplement (PMC4359585; doi:10.1186/s40168-015-0073-x), 2015-03-10

Figure S1A

### Individual 1 palm samples

### Individual 2 palm samples

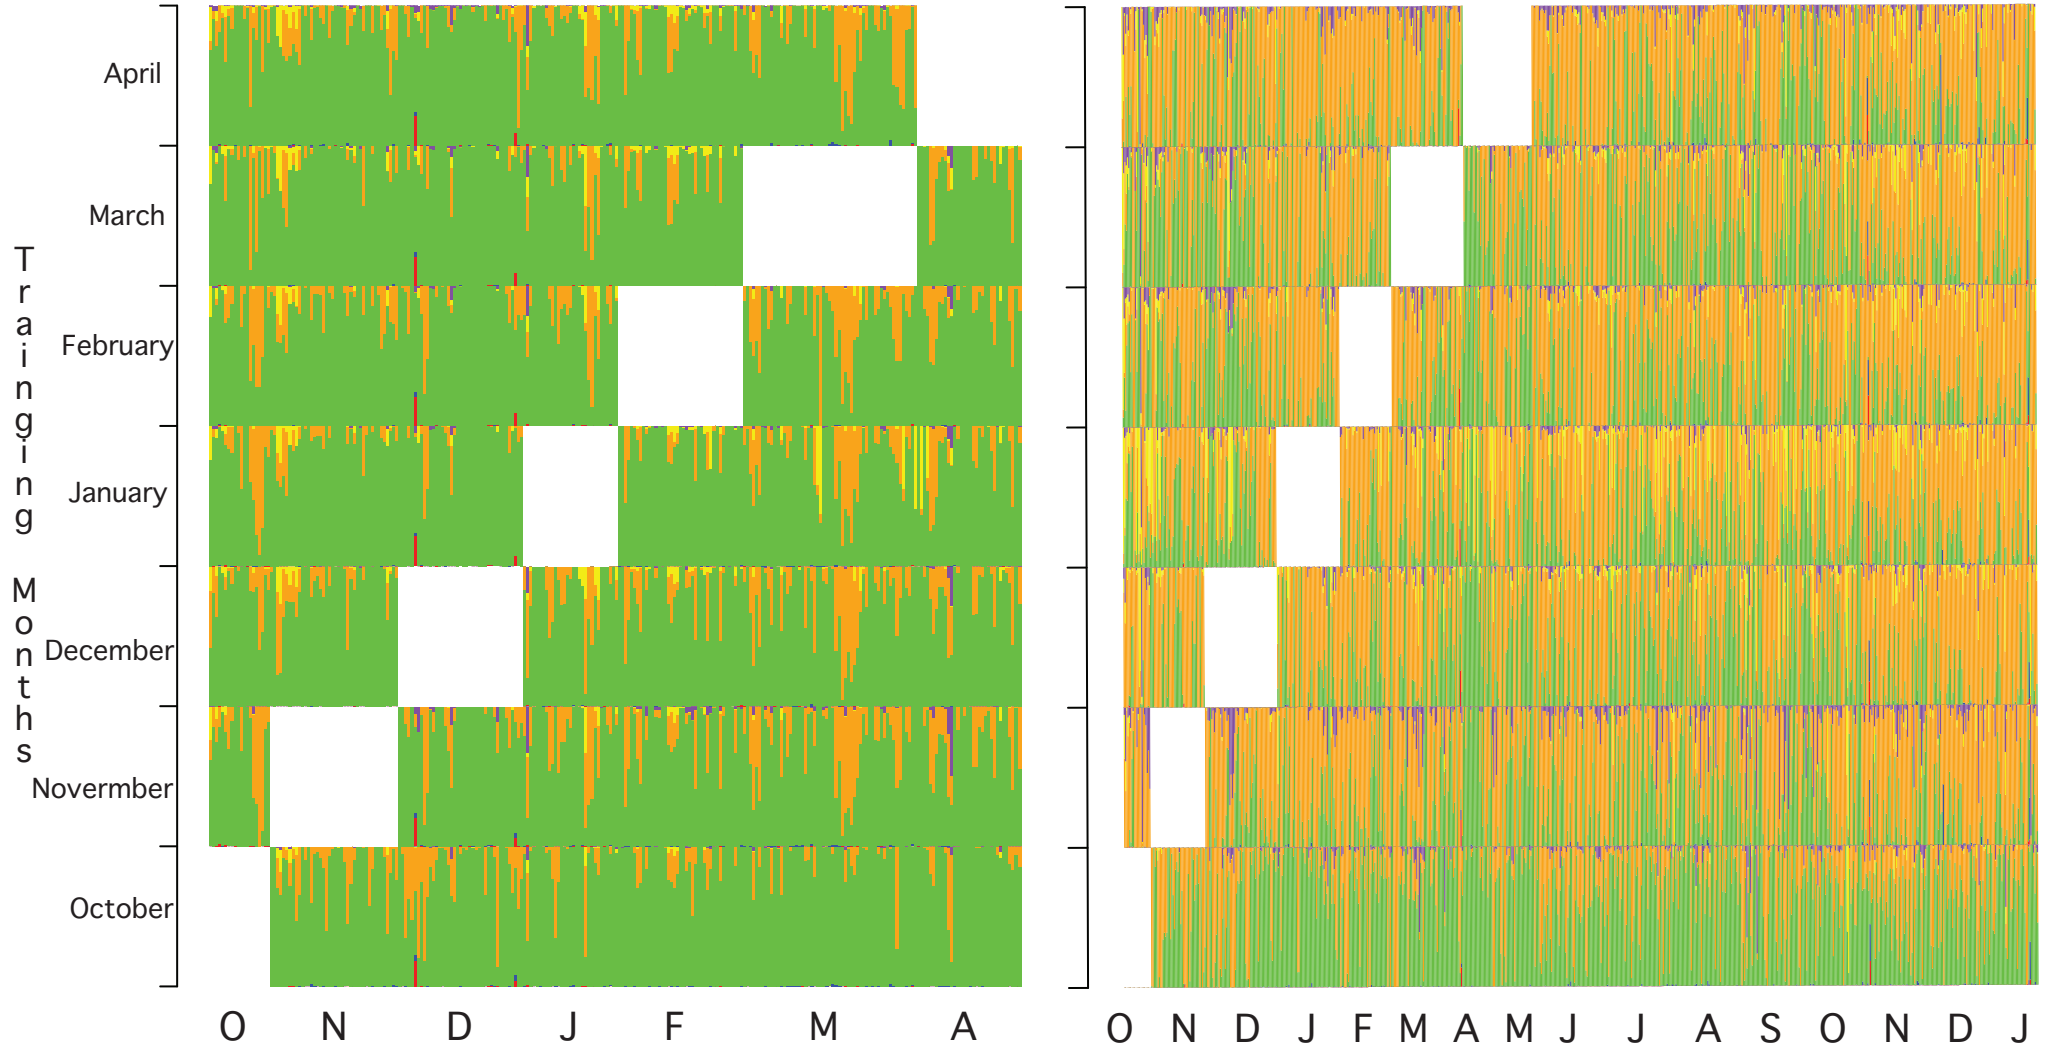

Prediction of individual samples within each month

- Feces1
- Feces2
- Palm1
- Palm2
- Tongue1
- Tongue2
- Training

Figure S1 B

Individual 1 tongue samples

Individual 2 tongue samples

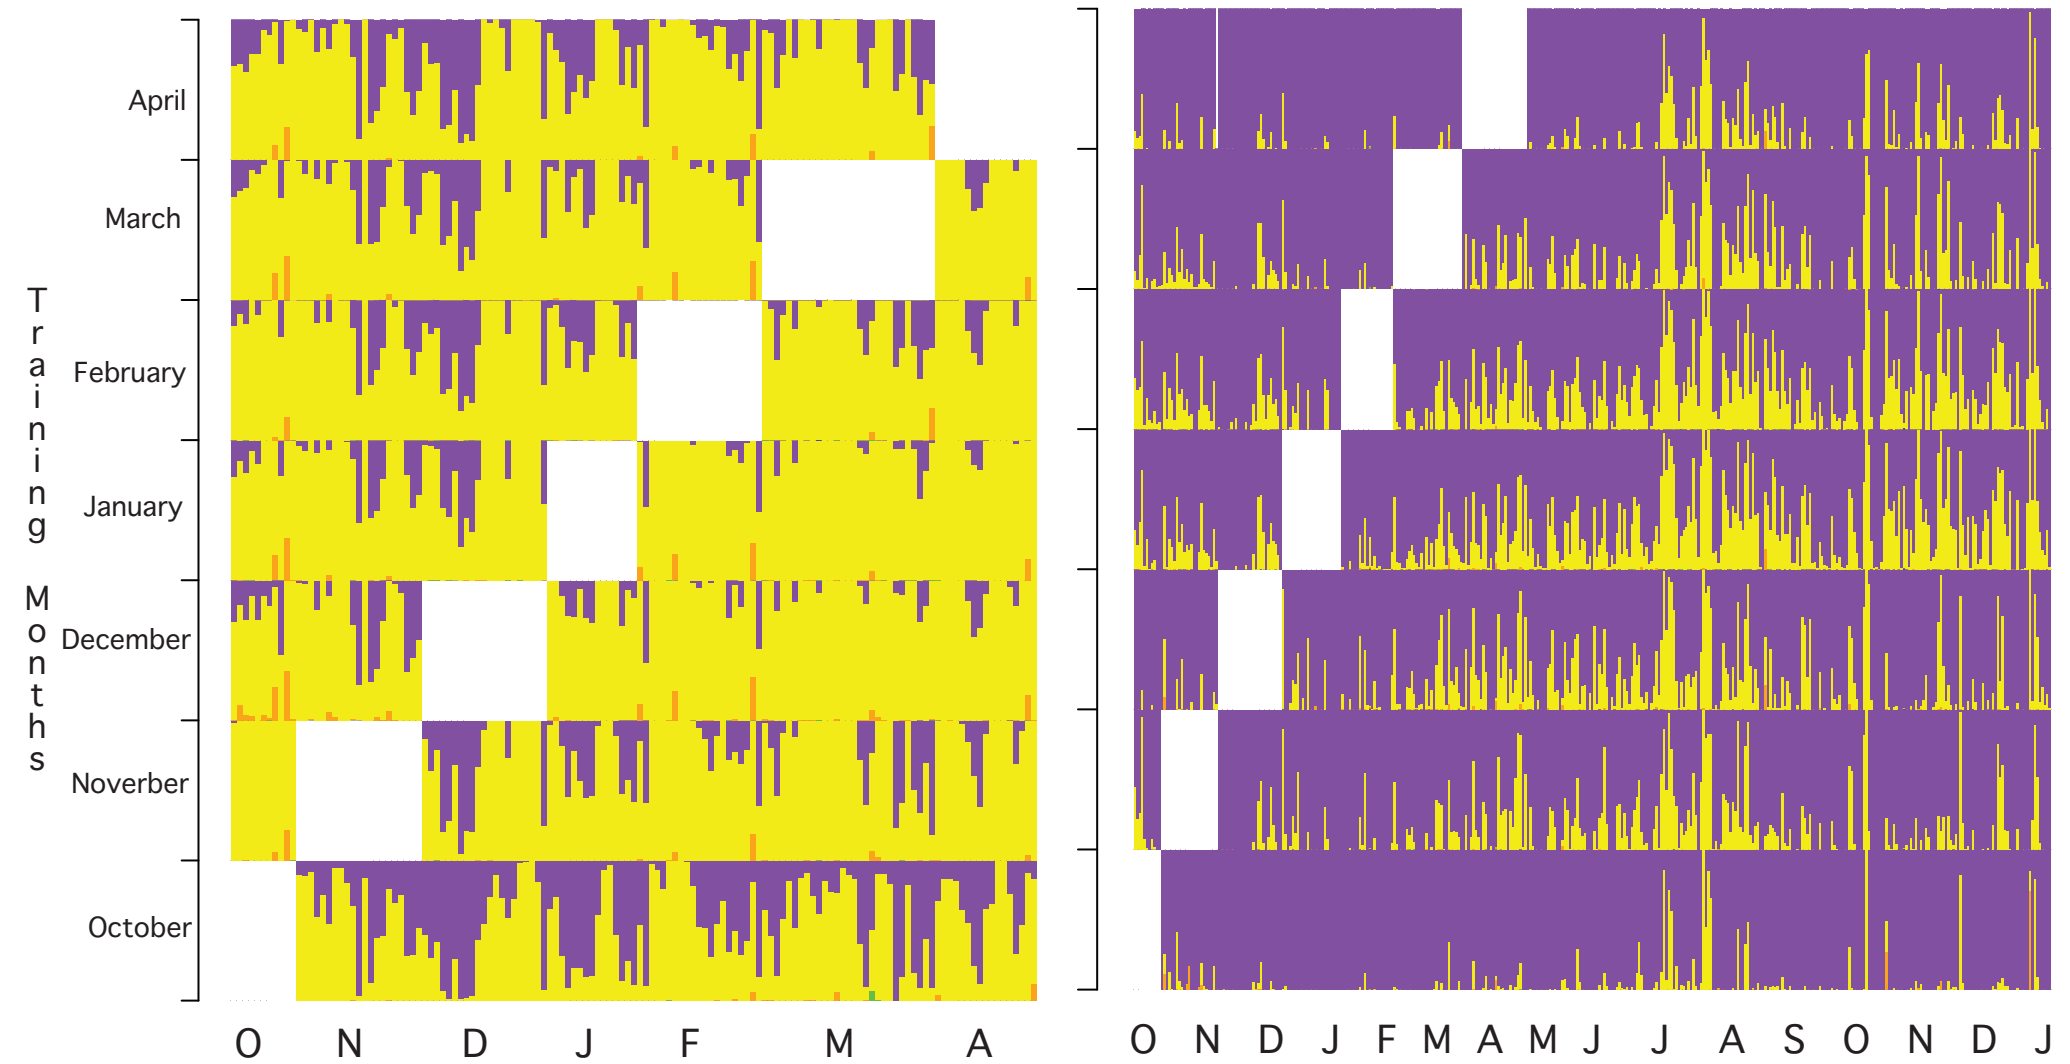

Supplement: 40168_2015_73_MOESM3_ESM.pdf [file 40168_2015_73_MOESM3_ESM.pdf]
