# Supplementary material for: BioMiCo: a supervised Bayesian model for inference of microbial community structure
Source: PubMed Central journal article supplement (PMC4359585; doi:10.1186/s40168-015-0073-x), 2015-03-10

Figure S2 A

Mislabeled samples indicated with an arrow.

These samples were originally labeled as fecal samples and later determined to be mislabeled.

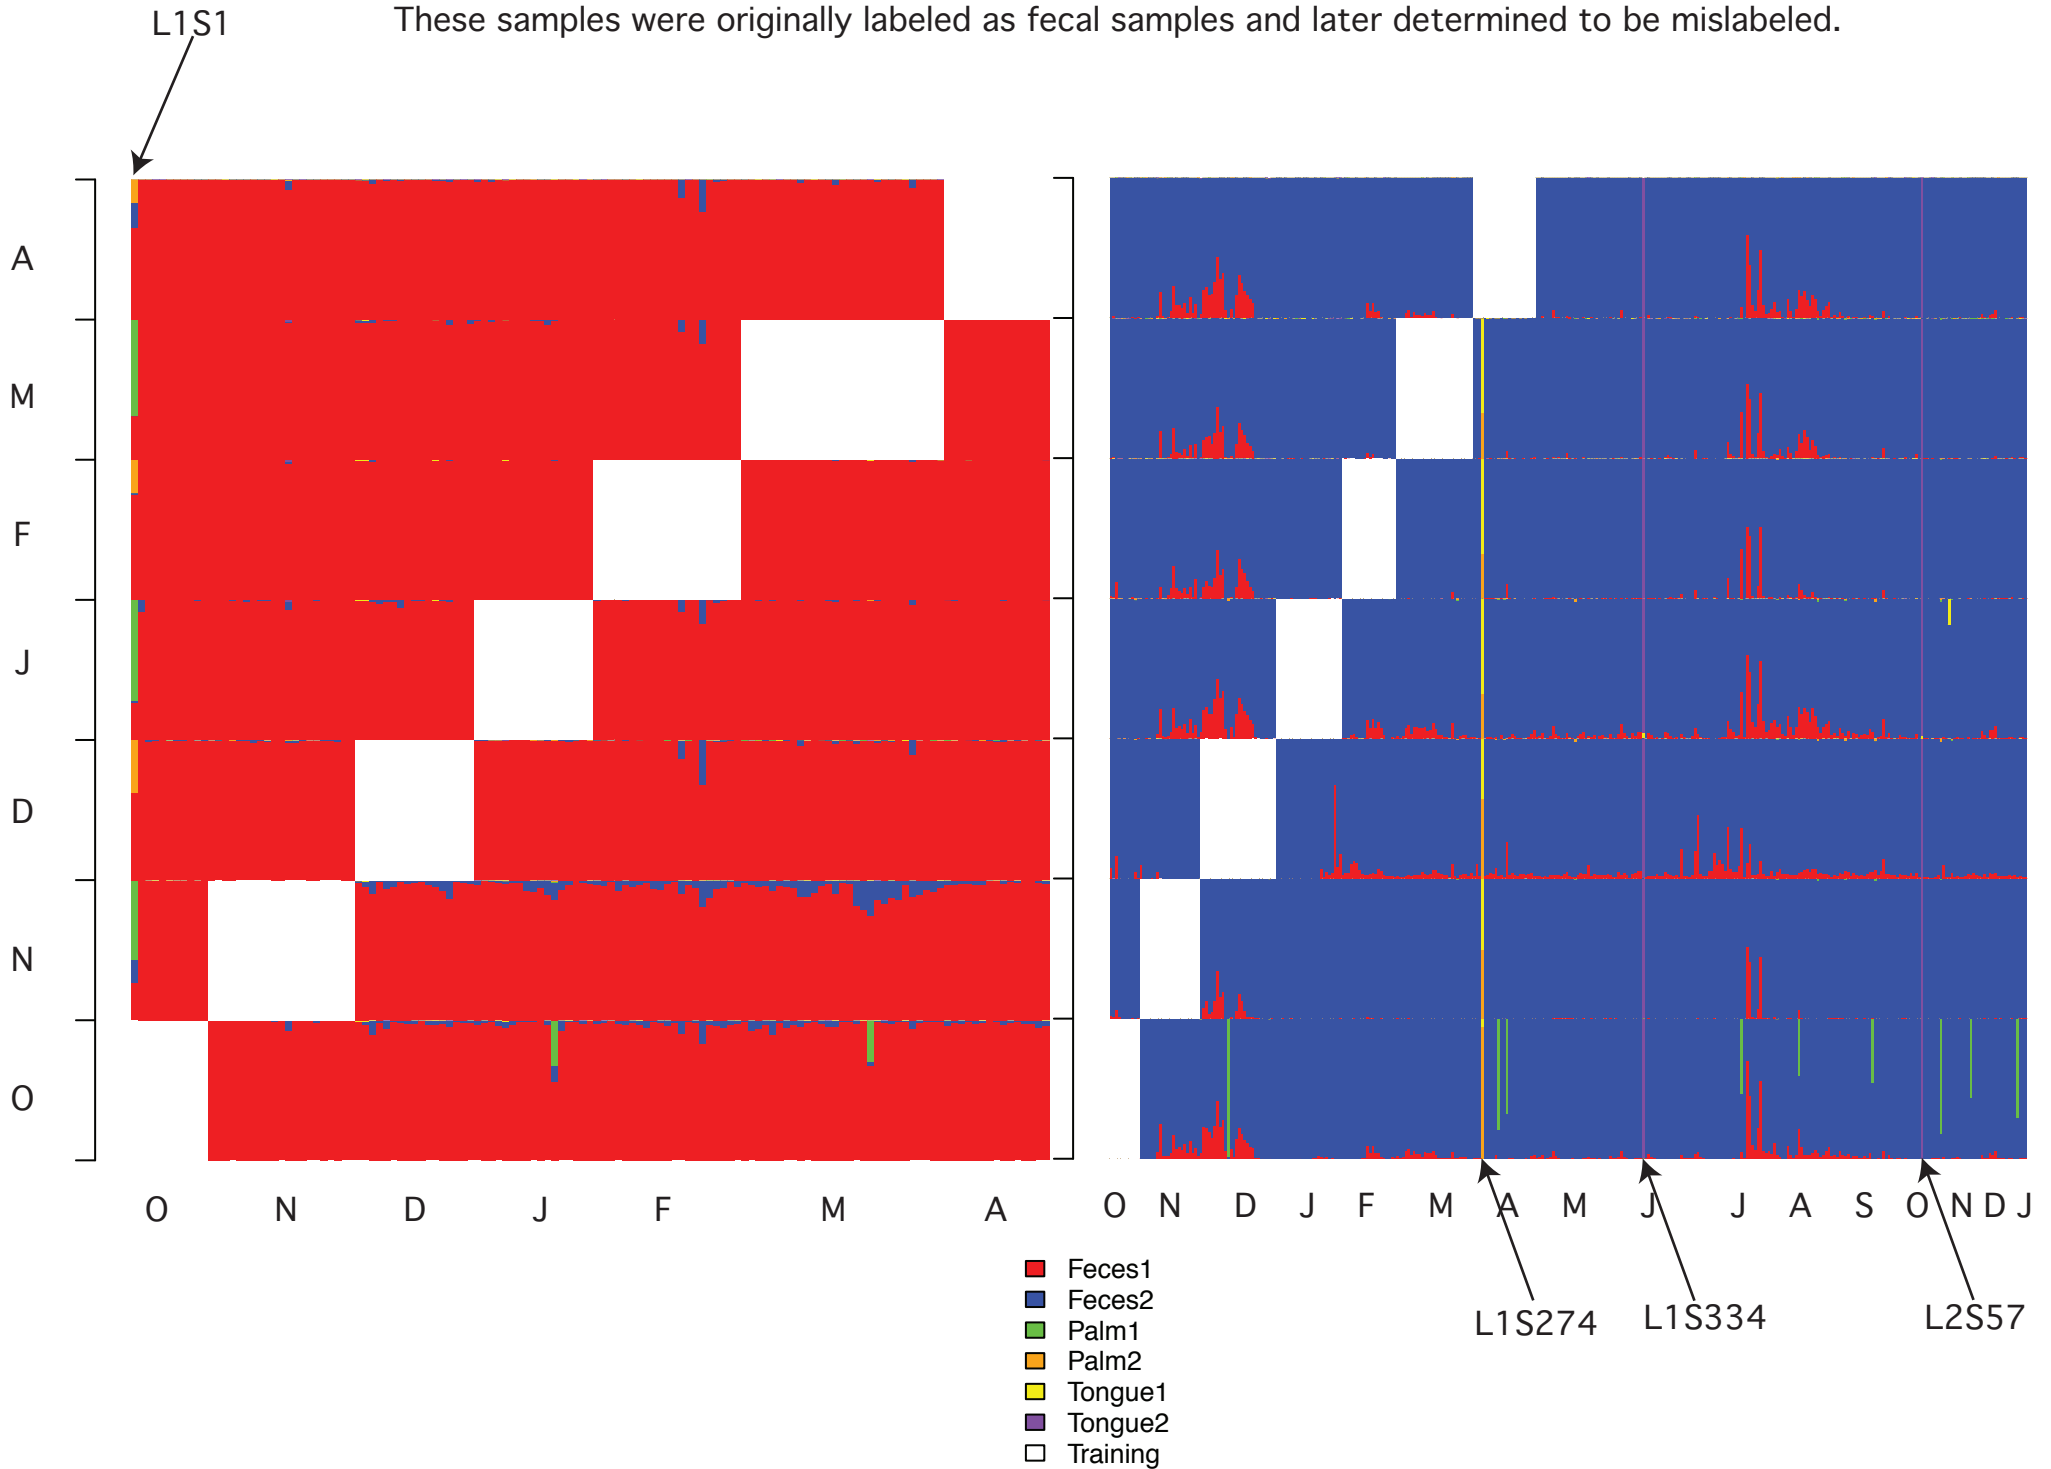

Figure S2 B

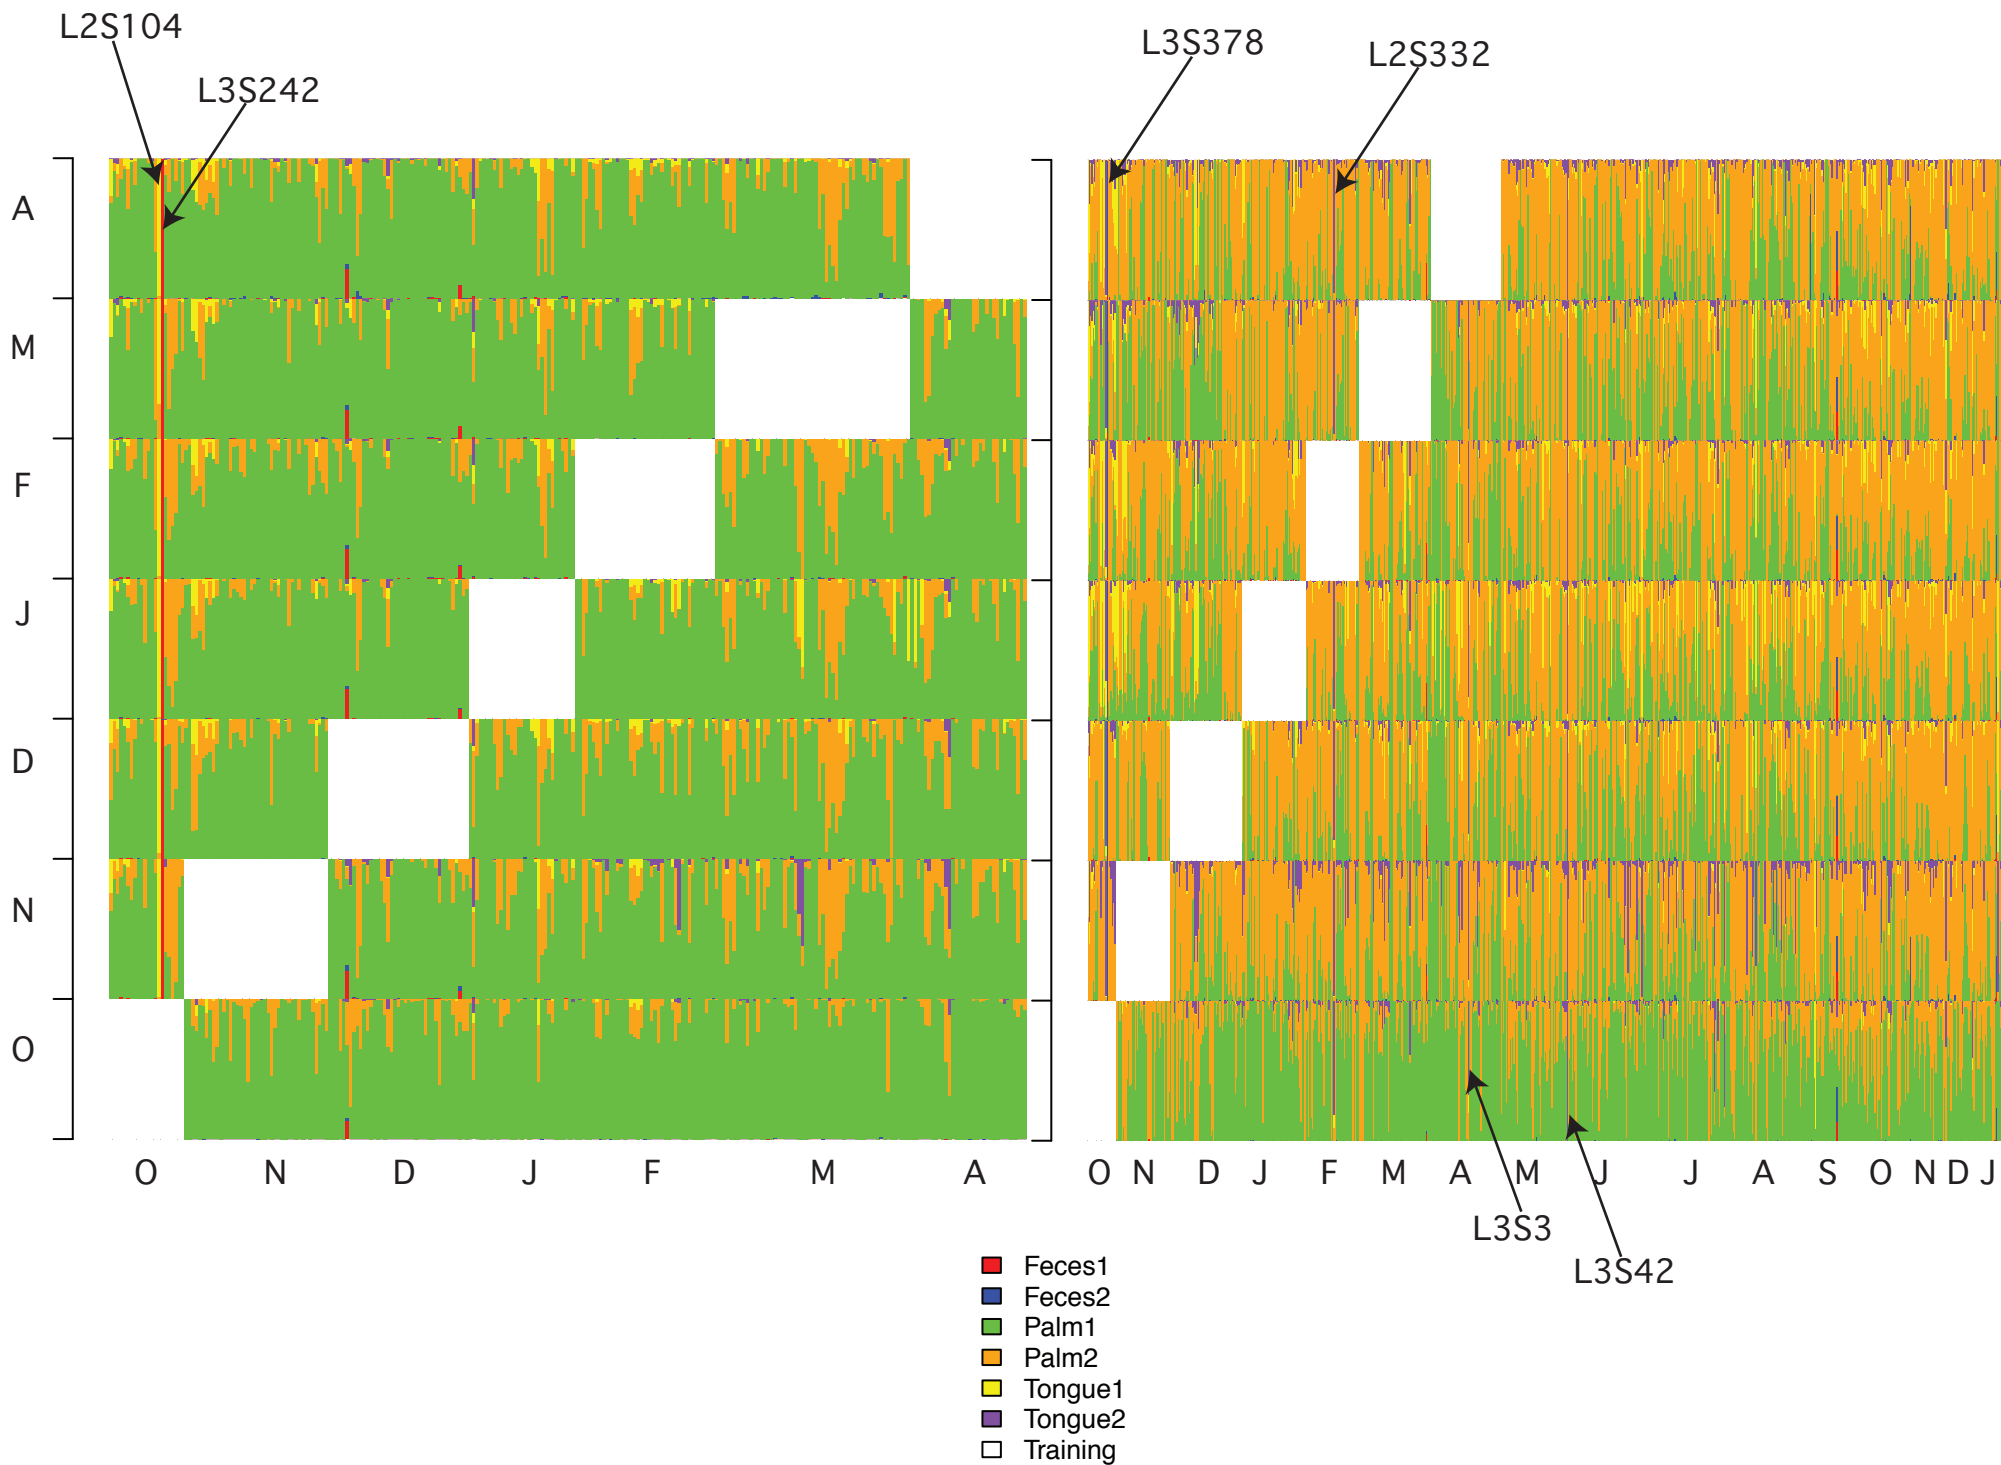

Figure S2 C

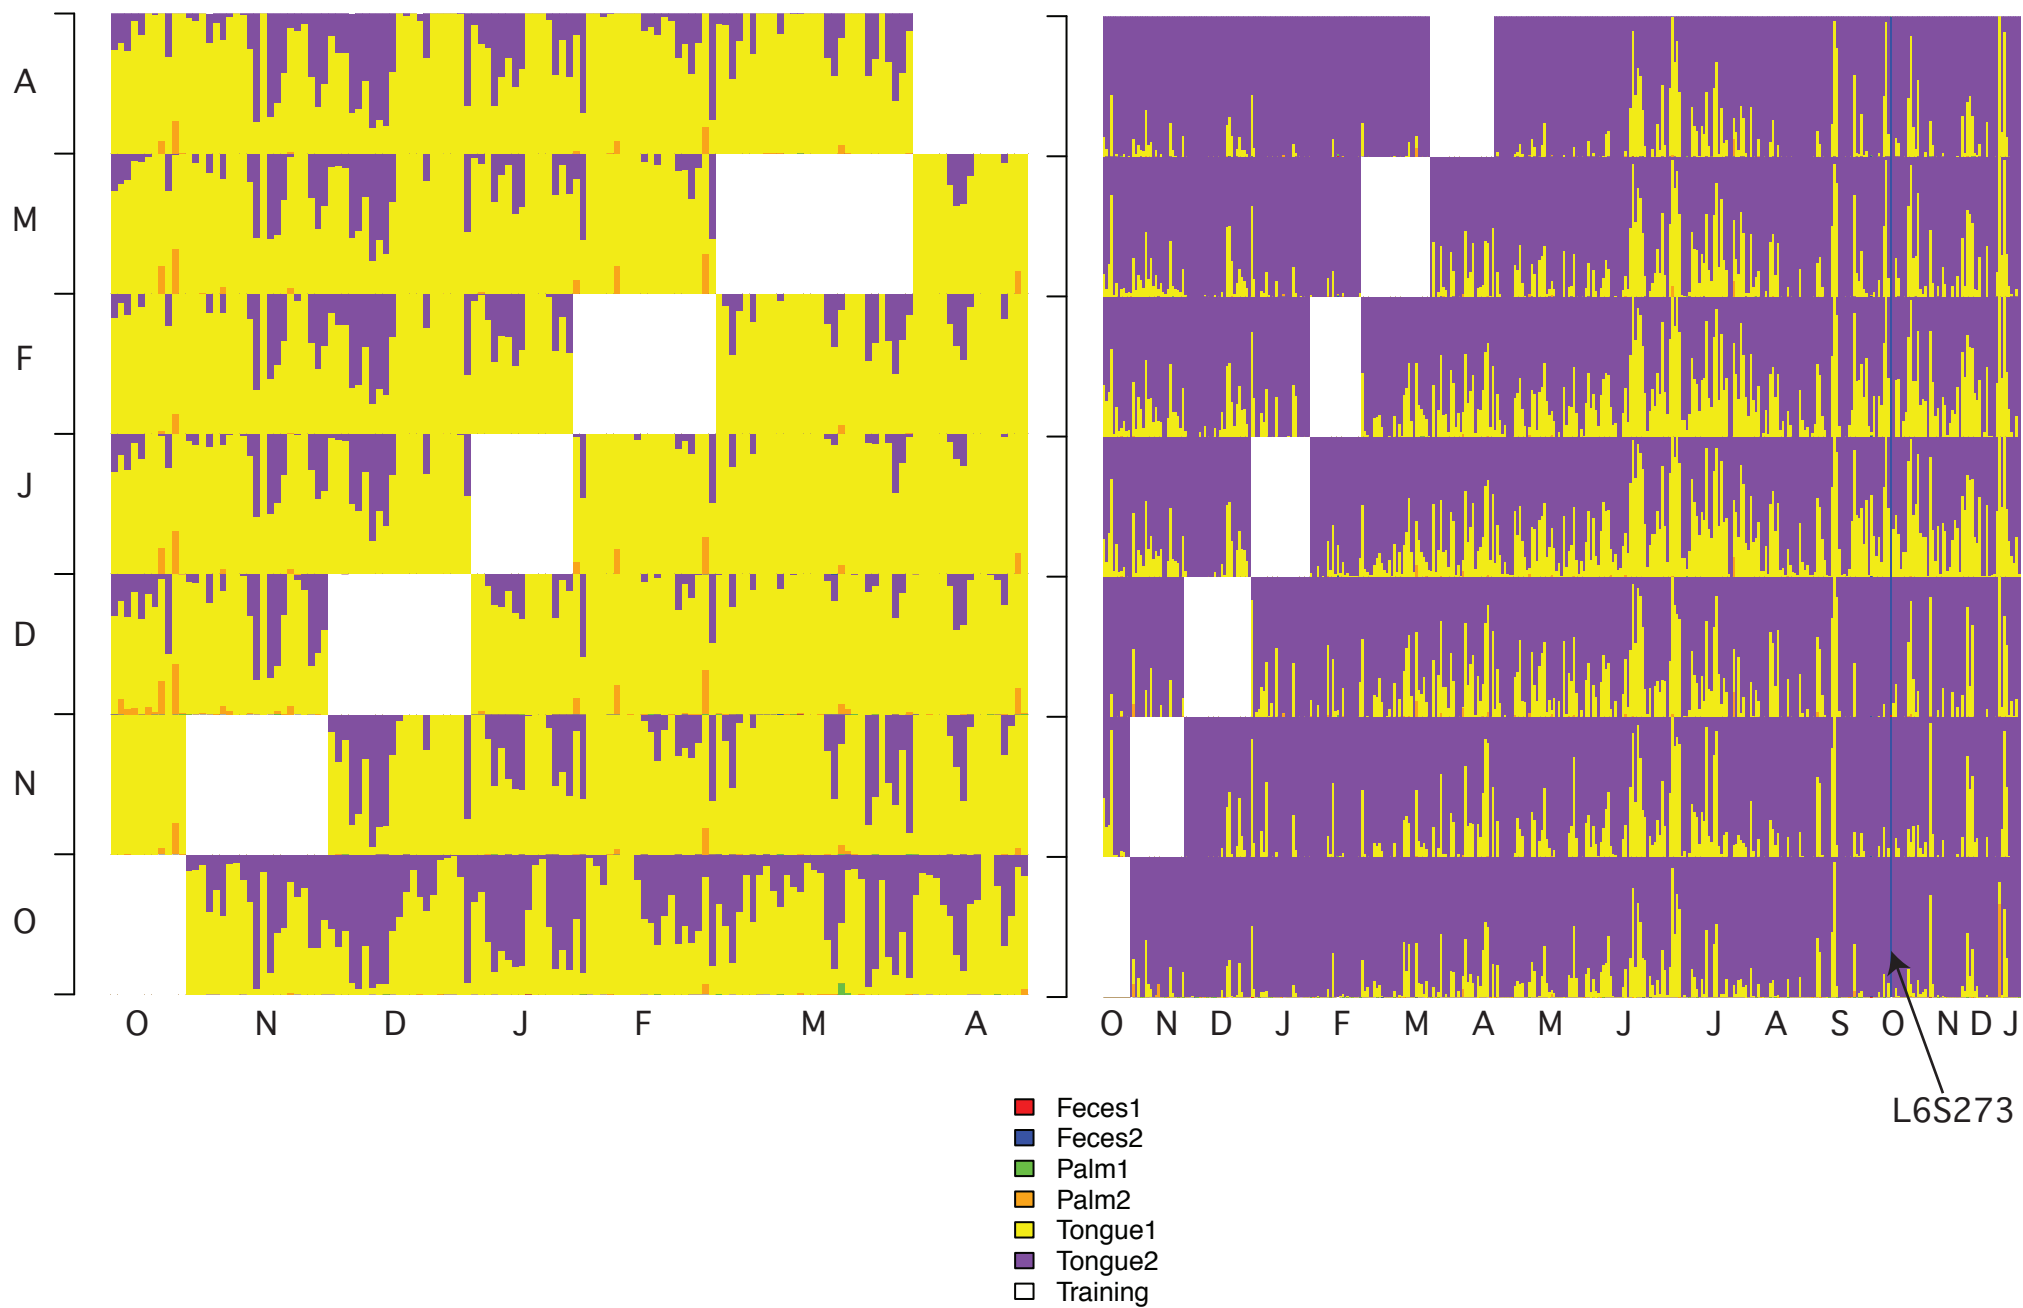

Supplement: 40168_2015_73_MOESM4_ESM.pdf [file 40168_2015_73_MOESM4_ESM.pdf]
